# Supplementary material for: Chromatomass-Spectrometric Method for the Quantitative Determination of Amino- and Carboxylic Acids in Biological Samples
Source: MDPI journal article supplement (doi:10.3390/metabo13010016), 2022-12-22
Supplement: s1 [file s1]

## Supplementary materials

**Table S1.** List of standards. (presented in ascending order of retention time, RT).

| Name                          | Retention time,<br>min | Empirical formula                                             | Mw, Da |
|-------------------------------|------------------------|---------------------------------------------------------------|--------|
| <u>Amino acids</u>            |                        |                                                               |        |
| Orn                           | 1,003                  | C <sub>5</sub> H <sub>12</sub> N <sub>2</sub> O <sub>2</sub>  | 132.16 |
| Ala                           | 1,091                  | C <sub>3</sub> H <sub>7</sub> NO <sub>2</sub>                 | 89.09  |
| Lys                           | 1,548                  | C <sub>6</sub> H <sub>14</sub> N <sub>2</sub> O <sub>2</sub>  | 146.19 |
| Arg                           | 1,846                  | C <sub>6</sub> H <sub>14</sub> N <sub>4</sub> O <sub>2</sub>  | 174.20 |
| Gly                           | 2,128                  | C <sub>2</sub> H <sub>5</sub> NO <sub>2</sub>                 | 75.07  |
| Asn                           | 2,138                  | C <sub>4</sub> H <sub>8</sub> N <sub>2</sub> O <sub>3</sub>   | 132.12 |
| Ser                           | 2,299                  | C <sub>3</sub> H <sub>7</sub> NO <sub>3</sub>                 | 105.09 |
| Gln                           | 2,468                  | C <sub>5</sub> H <sub>10</sub> N <sub>2</sub> O <sub>3</sub>  | 146.14 |
| Cit                           | 2,747                  | C <sub>6</sub> H <sub>13</sub> N <sub>3</sub> O <sub>3</sub>  | 175.20 |
| Thr                           | 3,027                  | C <sub>4</sub> H <sub>9</sub> NO <sub>3</sub>                 | 119.12 |
| Val                           | 5,416                  | C <sub>5</sub> H <sub>11</sub> NO <sub>2</sub>                | 117.15 |
| Tyr                           | 5,521                  | C <sub>9</sub> H <sub>11</sub> NO <sub>3</sub>                | 181.19 |
| Met                           | 5,637                  | C <sub>5</sub> H <sub>11</sub> NO <sub>2</sub> S              | 149.21 |
| Ile                           | 6,499                  | C <sub>6</sub> H <sub>13</sub> NO <sub>2</sub>                | 131.17 |
| Leu                           | 6,611                  | C <sub>6</sub> H <sub>13</sub> NO <sub>2</sub>                | 131.17 |
| Phe                           | 6,996                  | C <sub>9</sub> H <sub>11</sub> NO <sub>2</sub>                | 165.19 |
| Asp                           | 7,884                  | C <sub>4</sub> H <sub>7</sub> NO <sub>4</sub>                 | 133.10 |
| Trp                           | 8,278                  | C <sub>11</sub> H <sub>12</sub> N <sub>2</sub> O <sub>2</sub> | 204.23 |
| Glu                           | 8,352                  | C <sub>5</sub> H <sub>9</sub> NO <sub>4</sub>                 | 147.13 |
| Bet                           | 9,272                  | C <sub>5</sub> H <sub>11</sub> NO <sub>2</sub>                | 117.15 |
| <u>Carboxylic acids</u>       |                        |                                                               |        |
| Succinic acid                 | 2.7                    | C <sub>4</sub> H <sub>6</sub> O <sub>4</sub>                  | 116.07 |
| Lactic acid                   | 4.8                    | C <sub>3</sub> H <sub>6</sub> O <sub>3</sub>                  | 90.08  |
| Pyruvic acid                  | 6.0                    | C <sub>3</sub> H <sub>3</sub> O <sub>3</sub>                  | 87.05  |
| Oxaloacetic acid              | 6.3                    | C <sub>4</sub> H <sub>4</sub> O <sub>5</sub>                  | 132.07 |
| Isocitric acid                | 7.1                    | C <sub>6</sub> H <sub>8</sub> O <sub>7</sub>                  | 192.12 |
| Taurine                       | 7.6                    | C <sub>2</sub> H <sub>7</sub> NO <sub>3</sub> S               | 125.15 |
| Citric acid                   | 8.3                    | C <sub>6</sub> H <sub>8</sub> O <sub>7</sub>                  | 192.12 |
| α-Ketobutyric acid            |                        | C <sub>4</sub> H <sub>6</sub> O <sub>3</sub>                  | 102.09 |
| α-Ketomethylbutyric acid      | 9.1                    | C <sub>5</sub> H <sub>9</sub> O <sub>3</sub>                  | 117.05 |
| α-Ketomethylthiolbutyric acid | 9.4                    | C <sub>5</sub> H <sub>9</sub> O <sub>3</sub> S                | 149.02 |
| Malic acid                    | 9.5                    | C <sub>4</sub> H <sub>6</sub> O <sub>5</sub>                  | 134.09 |
| Fumaric acid                  | 10.1                   | C <sub>4</sub> H <sub>4</sub> O <sub>4</sub>                  | 116.07 |

**Table S2.** Equimolar solutions of amino acids\* (presented in ascending order of retention time)

| AA      | Mw  | Mass, mg | Volume, ml | Concentration, mg/ml | Concentration, mmol/L | Final concentration, $\mu$ mol/L |
|---------|-----|----------|------------|----------------------|-----------------------|----------------------------------|
| Orn     | 132 | 1.3      | 0.5        | 2.6                  | 9.85                  | 984.85                           |
| Ala     | 89  | 3.1      |            | 6.2                  | 35.06                 | 3505.62                          |
| Lys     | 146 | 7.4      |            | 14.8                 | 50.68                 | 5068.49                          |
| Arg     | 174 | 5.1      |            | 10.2                 | 29.31                 | 2931.03                          |
| Asn     | 132 | 8.2      |            | 16.4                 | 62.12                 | 6212.12                          |
| Gly     | 75  | 4.4      |            | 8.8                  | 58.67                 | 5866.67                          |
| Ser     | 105 | 4.7      |            | 9.4                  | 44.76                 | 4476.19                          |
| Gln     | 146 | 3.2      |            | 6.4                  | 21.92                 | 2191.78                          |
| Cit     | 175 | 2.4      |            | 4.8                  | 13.71                 | 1371.43                          |
| Thr     | 119 | 1.7      |            | 3.4                  | 14.29                 | 1428.57                          |
| Val     | 117 | 3.7      |            | 7.4                  | 31.62                 | 3162.39                          |
| Tyr     | 181 | 1.9      |            | 3.8                  | 10.50                 | 1049.72                          |
| Met     | 149 | 3.0      |            | 6                    | 20.13                 | 2013.42                          |
| Leu/Ile | 131 | 4.7      |            | 9.4                  | 35.88                 | 3587.79                          |
| Phe     | 165 | 4.3      |            | 8.6                  | 26.06                 | 2606.06                          |
| Asp     | 133 | 4.3      |            | 8.6                  | 32.33                 | 3233.08                          |
| Trp     | 204 | 2.1      |            | 4.2                  | 10.29                 | 1029.41                          |
| Glu     | 147 | 7.7      |            | 15.4                 | 52.38                 | 5238.10                          |
| Cys     | 121 | 4.4      |            | 8.8                  | 36.36                 | 3636.36                          |

\* Masses of arbitrary weights, calculated concentrations (mg/ml) and volumes of amino acid solutions for preparing an equimolar mixture.

**Table S3.** Equimolar solution (1 mmol/L) of carboxylic acids\* (presented in ascending order of retention time)

| Chemical name                         | Molecular formula                               | Mw     | Sample weight, mg | Concentration, mmol/L |
|---------------------------------------|-------------------------------------------------|--------|-------------------|-----------------------|
| Succinic acid                         | C <sub>4</sub> H <sub>6</sub> O <sub>4</sub>    | 116.07 | 7.60              | 130.96                |
| Lactic acid                           | C <sub>3</sub> H <sub>6</sub> O <sub>3</sub>    | 90.08  | -                 | -                     |
| Pyruvic acid                          | C <sub>3</sub> H <sub>3</sub> O <sub>3</sub>    | 87.05  | 1.60              | 36.76                 |
| Oxaloacetic acid                      | C <sub>4</sub> H <sub>4</sub> O <sub>5</sub>    | 132.07 | 1.40              | 21.20                 |
| Isocitric acid                        | C <sub>6</sub> H <sub>8</sub> O <sub>7</sub>    | 192.12 | 1.60              | 16.66                 |
| Taurine                               | C <sub>2</sub> H <sub>7</sub> NO <sub>3</sub> S | 125.15 | 12.50             | 199.76                |
| Citric acid                           | C <sub>6</sub> H <sub>8</sub> O <sub>7</sub>    | 192.12 | 5.40              | 56.21                 |
| $\alpha$ -ketobutyric acid            | C <sub>4</sub> H <sub>6</sub> O <sub>3</sub>    | 102.09 | 1.70              | 33.30                 |
| $\alpha$ -ketomethylbutyric acid      | C <sub>5</sub> H <sub>9</sub> O <sub>3</sub>    | 117.05 | 1.60              | 27.34                 |
| $\alpha$ -ketomethylthiolbutyric acid | C <sub>5</sub> H <sub>9</sub> O <sub>3</sub> S  | 149.02 | 1.00              | 13.42                 |
| Malic acid                            | C <sub>4</sub> H <sub>6</sub> O <sub>5</sub>    | 134.09 | 3.80              | 56.68                 |
| Fumaric acid                          | C <sub>4</sub> H <sub>4</sub> O <sub>4</sub>    | 116.07 | 0.90              | 15.51                 |

\* Arbitrary weights of carboxylic acids were dissolved in a fixed volume (0.5 ml) and the molar concentration of the resulting solution was calculated.

**Table S4.** Quantitative HPLC-MS/MS measurements of amino- and carboxylic acids in duplicates obtained using time-of-flight quadrupole MS from samples of primary human lung fibroblasts (HLF) cell culture.

Unit of measurement,  $\mu\text{M}$ , or  $10^{-6}$  M. N/D – non-detectable. (Metabolites are listed in ascending order of retention time)

Points of cells growth: 0 point – HLF 01, 24 h – HLF 02, 48 h – HLF 03, 72 h – HLF 04, 1 week – HLF 05, 2 weeks – HLF 06.

| Metabolite             | HLF 01 |        | HLF 02 |        | HLF 03 |        | HLF 04 |        | HLF 05 |        | HLF 06 |        |
|------------------------|--------|--------|--------|--------|--------|--------|--------|--------|--------|--------|--------|--------|
| <u>Amino acids</u>     |        |        |        |        |        |        |        |        |        |        |        |        |
| Ornithine              | 1,185  | 1,189  | 10,755 | 10,228 | 3,726  | 3,757  | 1,274  | 1,297  | 1,989  | 2,100  | 7,627  | 7,250  |
| Alanine                | 2,075  | 2,118  | 2,718  | 2,854  | 1,250  | 1,253  | 3,716  | 3,663  | 1,350  | 1,378  | 1,233  | 1,262  |
| Lysine                 | 12,614 | 11,874 | 15,243 | 15,118 | 14,117 | 14,111 | 16,430 | 18,516 | 14,289 | 13,157 | 6,211  | 6,282  |
| Arginine               | 19,109 | 19,394 | 23,483 | 23,551 | 20,301 | 20,384 | 16,794 | 16,885 | 17,377 | 16,763 | 20,617 | 21,314 |
| Asparagine             | 18,511 | 18,833 | 22,137 | 25,358 | 19,716 | 20,695 | 17,089 | 16,427 | 15,934 | 17,723 | 18,883 | 19,236 |
| Glycine                | 11,109 | 11,147 | 12,398 | 13,358 | 5,355  | 5,539  | 7,842  | 7,448  | 5,195  | 5,073  | 1,079  | 1,173  |
| Serine                 | 9,107  | 10,171 | 10,266 | 10,966 | 9,037  | 9,275  | 6,545  | 6,903  | 5,987  | 5,957  | 4,976  | 5,531  |
| Glutamine              | 52,509 | 55,775 | 48,541 | 51,698 | 54,549 | 60,211 | 42,936 | 45,615 | 46,713 | 51,941 | 46,549 | 52,136 |
| Citrulline             | 0,031  | 0,034  | 0,060  | 0,068  | 0,049  | 0,054  | 0,024  | 0,023  | 0,049  | 0,055  | 0,094  | 0,106  |
| Threonine              | 12,344 | 10,817 | 14,148 | 12,880 | 14,255 | 13,462 | 13,383 | 13,168 | 14,030 | 14,502 | 14,924 | 14,806 |
| Valine                 | 1,427  | 1,471  | 1,744  | 1,690  | 1,700  | 1,729  | 1,565  | 1,614  | 1,537  | 1,585  | 1,433  | 1,513  |
| Tyrosine               | 3,301  | 3,172  | 3,912  | 3,626  | 4,050  | 4,165  | 4,682  | 4,735  | 4,638  | 4,648  | 4,224  | 4,601  |
| Methionine (sulfoxide) | 1,365  | 1,405  | 1,196  | 1,235  | 0,891  | 0,923  | 1,002  | 0,991  | 5,690  | 6,168  | 3,868  | 3,820  |
| Selenomethionine       | 0,701  | 0,723  | 2,447  | 2,535  | 2,936  | 3,128  | 5,690  | 5,549  | 6,369  | 6,371  | 3,899  | 4,076  |
| Leucine                | 10,260 | 9,782  | 10,770 | 9,847  | 10,405 | 10,146 | 10,084 | 10,118 | 9,417  | 8,563  | 8,548  | 7,978  |
| Isoleucine             | 10,260 | 10,152 | 10,770 | 11,632 | 10,405 | 11,305 | 10,084 | 10,087 | 9,417  | 10,173 | 8,548  | 8,938  |
| Phenylalanine          | 2,268  | 1,997  | 2,543  | 2,416  | 2,473  | 2,402  | 2,801  | 2,604  | 2,814  | 2,596  | 2,667  | 2,526  |
| Aspartate              | 7,332  | 8,249  | 8,177  | 7,819  | 5,734  | 5,933  | 5,196  | 5,705  | 4,233  | 4,743  | 5,276  | 5,507  |
| Tryptophane            | 0,605  | 0,598  | 0,594  | 0,579  | 0,736  | 0,714  | 0,638  | 0,599  | 0,771  | 0,684  | 0,773  | 0,721  |
| Glutamate              | 5,628  | 5,289  | 11,643 | 11,356 | 9,761  | 9,489  | 8,958  | 8,892  | 9,040  | 8,400  | 8,601  | 8,867  |
| Betaine                | 1,427  | 1,486  | 1,744  | 1,603  | 1,700  | 1,625  | 1,565  | 1,413  | 1,537  | 1,477  | 1,433  | 1,316  |
| Cysteine (sulfonate)   | 5,110  | 4,719  | 3,997  | 3,724  | 5,083  | 4,929  | 3,590  | 3,545  | 3,219  | 3,011  | 3,457  | 3,086  |
| Glutathione (oxidized) | 0,066  | 0,065  | 0,615  | 0,570  | 0,648  | 0,665  | 1,008  | 0,959  | 0,219  | 0,216  | 0,636  | 0,659  |
| Proline                | 5,653  | 5,640  | 7,005  | 6,573  | 5,793  | 5,367  | 8,318  | 9,177  | 6,365  | 6,239  | 7,871  | 8,062  |
| Histidine (2-oxo-)     | 1,984  | 1,878  | 2,498  | 2,719  | 2,333  | 2,432  | 2,476  | 2,613  | 2,030  | 1,968  | 1,516  | 1,424  |

| <u>Carboxylic acids</u>            |        |        |       |       |       |       |       |       |        |        |       |       |
|------------------------------------|--------|--------|-------|-------|-------|-------|-------|-------|--------|--------|-------|-------|
| Succinate                          | 0,450  | 0,467  | 0,793 | 0,781 | 0,172 | 0,179 | 0,138 | 0,132 | 1,598  | 1,635  | 0,244 | 0,251 |
| Lactate                            | 19,758 | 20,288 | 7,772 | 8,072 | 5,784 | 5,873 | 6,408 | 6,524 | 18,033 | 18,873 | 8,228 | 8,628 |
| Pyruvate                           | 1,075  | 1,097  | 0,168 | 0,156 | 0,177 | 0,173 | 0,050 | 0,051 | 2,123  | 2,134  | 0,168 | 0,169 |
| Oxaloacetate                       | 1,846  | 1,831  | 1,702 | 1,659 | 0,414 | 0,414 | 0,069 | 0,066 | 3,115  | 3,028  | 0,197 | 0,197 |
| Isocitrate                         | 0,003  | 0,003  | 0,010 | 0,010 | 0,001 | 0,001 | 0,001 | 0,001 | 0,112  | 0,114  | 0,001 | 0,001 |
| Taurine                            | 0,025  | 0,024  | 0,029 | 0,029 | 0,084 | 0,090 | 0,071 | 0,071 | 0,067  | 0,069  | 0,119 | 0,114 |
| Citrate                            | 0,016  | 0,016  | N/D   | N/D   | N/D   | N/D   | 0,001 | 0,001 | 0,388  | 0,392  | N/D   | N/D   |
| $\alpha$ -Ketobutyrate             | 0,447  | 0,451  | 0,305 | 0,306 | 0,334 | 0,325 | 0,367 | 0,357 | 0,753  | 0,739  | 0,570 | 0,567 |
| $\alpha$ -Ketomethylbutyrate       | 0,330  | 0,352  | 0,201 | 0,219 | 0,152 | 0,157 | 0,039 | 0,038 | 0,699  | 0,716  | 0,048 | 0,051 |
| $\alpha$ -Ketomethylselenobutyrate | N/D    | N/D    | 0,060 | 0,063 | 0,170 | 0,181 | 0,272 | 0,285 | 0,071  | 0,075  | 0,180 | 0,191 |
| $\alpha$ -Ketoglutaramate          | 0,175  | 0,182  | 0,034 | 0,033 | 0,434 | 0,406 | 2,426 | 2,638 | 0,011  | 0,011  | 1,764 | 1,712 |
| $\alpha$ -Ketoglutarate            | 0,001  | 0,001  | 0,001 | 0,001 | 0,030 | 0,028 | 0,002 | 0,002 | 0,001  | 0,001  | 0,001 | 0,001 |
| Malate                             | 0,206  | 0,215  | 0,399 | 0,404 | 0,019 | 0,020 | 0,014 | 0,014 | 2,024  | 2,140  | 0,010 | 0,010 |
| Fumarate                           | 1,916  | 1,946  | 0,590 | 0,579 | 0,129 | 0,129 | 0,095 | 0,100 | 1,505  | 1,499  | 0,523 | 0,536 |
| cisAconitate                       | 0,004  | 0,004  | 0,030 | 0,031 | 0,025 | 0,025 | 0,075 | 0,076 | 0,022  | 0,022  | 0,072 | 0,070 |
| CoA                                | 4,087  | 4,127  | 4,561 | 4,547 | 4,811 | 4,844 | 3,645 | 3,433 | 4,420  | 4,494  | 4,606 | 4,583 |
| acetyl-CoA                         | 0,040  | 0,041  | 0,765 | 0,786 | 0,895 | 0,899 | 1,061 | 1,049 | 0,808  | 0,846  | 1,630 | 1,727 |
